# Supplementary material for: Different Associations between Tonsil Microbiome, Chronic Tonsillitis, and Intermittent Hypoxemia among Obstructive Sleep Apnea Children of Different Weight Status: A Pilot Case-Control Study
Source: MDPI journal article supplement (doi:10.3390/jpm11060486), 2021-05-28
Supplement: s1 [file s1]

## Supplementary Materials

**Table S1.** Patient characteristics, polysomnography variables, and blood pressures of the over-weight and under-weight subgroups.

| Variables                         | Over-weight subgroup<br><i>n</i> = 30 | Under-weight subgroup<br><i>n</i> = 3 | <i>p</i> -Value <sup>1</sup> |
|-----------------------------------|---------------------------------------|---------------------------------------|------------------------------|
| <b>Patient characteristics</b>    |                                       |                                       |                              |
| Age (years)                       | 7.0 (6.0–10.0)                        | 8.0 (5.0–)                            | > 0.999                      |
| Male sex, <i>n</i> (%)            | 25 (83%)                              | 3 (100%)                              | > 0.999                      |
| Chronic tonsillitis, <i>n</i> (%) | 6 (20%)                               | 0 (0%)                                | > 0.999                      |
| Allergic rhinitis, <i>n</i> (%)   | 19 (63%)                              | 3 (100%)                              | 0.534                        |
| BMI (kg/m <sup>2</sup> ) z-score  | 2.10 (1.40–2.44)                      | −7.60 (−7.45–)                        | < 0.001 *                    |
| Tonsil size                       | 3 (3–4)                               | 4 (3–)                                | 0.260                        |
| ANR                               | 0.73 (0.63–0.83)                      | 0.74 (0.67–)                          | 0.571                        |
| OSA-18 score                      | 80 (69–94)                            | 77 (73–)                              | 0.614                        |
| <b>Polysomnography variables</b>  |                                       |                                       |                              |
| AHI (events/h)                    | 9.6 (5.1–26.3)                        | 6.1 (6.0–)                            | 0.571                        |
| RDI (events/h)                    | 12.1 (7.3–29.7)                       | 13.1 (6.0–)                           | 0.791                        |
| ODI (events/h)                    | 8.5 (3.4–23.2)                        | 3.2 (1.8–)                            | 0.100                        |
| Mean SpO <sub>2</sub> (%)         | 97 (96–98)                            | 92 (91–)                              | 0.082                        |
| Minimal SpO <sub>2</sub> (%)      | 89 (83–91)                            | 91 (88–93)                            | 0.070                        |
| N1 stage                          | 14 (6–21)                             | 10 (9–)                               | 0.837                        |
| N2 stage                          | 37 (31–45)                            | 41 (37–)                              | 0.491                        |
| N3 stage                          | 28 (23–31)                            | 19 (17–)                              | 0.260                        |
| REM stage                         | 18 (12–22)                            | 21 (21–)                              | 0.149                        |
| <b>Blood pressure variables</b>   |                                       |                                       |                              |
| Systolic BP, mmHg                 | 111 (100–121)                         | 85 (61–)                              | 0.188                        |
| Diastolic BP, mmHg                | 66 (61–74)                            | 64 (46–)                              | 0.571                        |
| Systolic BP percentile (%)        | 85 (66–91)                            | 17 (8–)                               | 0.260                        |
| Diastolic BP percentile (%)       | 75 (55–87)                            | 71 (27–)                              | 0.701                        |

Note: Data are summarized as median (interquartile range) or *n* (%) as appropriate. Abbreviations: AHI, apnea–hypopnea index; ANR, adenoidal–nasopharyngeal ratio; BMI, body mass index; BP, blood pressure; ODI, oxygen desaturation index; OSA, obstructive sleep apnea; RDI, respiratory disturbance index; REM, rapid eye movement; SpO<sub>2</sub>, pulse oxygen saturation. <sup>1</sup> Data were compared using the Mann–Whitney *U* test for continuous variables, and the chi-square test for categorical variables. \* Significant differences *p* < 0.05.
